# Supplementary material
Source: PubMed Central journal article supplement (PMC5492387)
Supplement: NIHMS866290-supplement-Supplemental_Data.pdf [file NIHMS866290-supplement-Supplemental_Data.pdf]

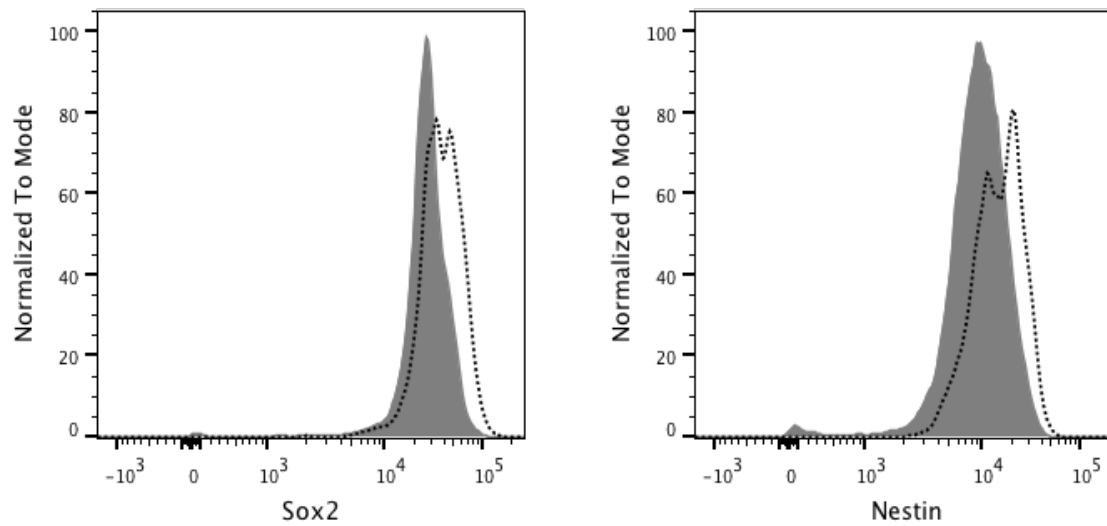

**Supplemental Fig. 1** The expression of stemness markers is increased in CD133<sup>+</sup> Cells. The intracellular expression of Sox2 and Nestin in CD133<sup>+</sup> cells compared to all live cells was determined by flow cytometry. Representative of 2 experiments.
